# Supplementary material
Source: publisher figshare collection journal article supplement (https://gsajournals.figshare.com/ndownloader/files/34695175)
Supplement: Supplementary file 1 [file 34695175]

Description	Accession	species	Percent_ident
histone-lysine N-methyltransferase PR-Set7 isoform X2 [Drosophila albomicans]	XP_034114047.1	Drosophila albomicans	62.91
histone-lysine N-methyltransferase PR-Set7 isoform X2 [Drosophila innubila]	XP_034486488.1	Drosophila innubila	63.64
histone-lysine N-methyltransferase PR-Set7 isoform X1 [Drosophila grimshawi]	XP_001994872.2	Drosophila grimshawi	55.31
histone-lysine N-methyltransferase PR-Set7 [Drosophila hydei]	XP_023173860.2	Drosophila hydei	68.92
histone-lysine N-methyltransferase PR-Set7 [Drosophila novamexicana]	XP_030573495.1	Drosophila novamexicana	58.3
histone-lysine N-methyltransferase PR-Set7 [Drosophila virilis]	XP_002054440.2	Drosophila virilis	57.91
histone-lysine N-methyltransferase pr-set7 [Drosophila willistoni]	XP_002070610.2	Drosophila willistoni	65.14
histone-lysine N-methyltransferase PR-Set7 [Drosophila miranda]	XP_017141104.1	Drosophila miranda	59.82
histone-lysine N-methyltransferase PR-Set7 [Drosophila pseudoobscura]	XP_001358957.3	Drosophila pseudoobscura	60.26
histone-lysine N-methyltransferase PR-Set7 [Drosophila persimilis]	XP_002013241.1	Drosophila persimilis	60.23
histone-lysine N-methyltransferase PR-Set7 [Drosophila obscura]	XP_022211000.2	Drosophila obscura	59.79
histone-lysine N-methyltransferase PR-Set7 [Drosophila subobscura]	XP_034663312.1	Drosophila subobscura	61.92
histone-lysine N-methyltransferase PR-Set7 [Drosophila guanche]	XP_034128258.1	Drosophila guanche	61.27
histone-lysine N-methyltransferase PR-Set7 [Scaptodrosophila lebanonensis]	XP_030371630.1	Scaptodrosophila lebanonensis	55.86
histone-lysine N-methyltransferase pr-set7 [Drosophila serrata]	XP_020798522.1	Drosophila serrata	72.91
histone-lysine N-methyltransferase PR-Set7 [Drosophila kikkawai]	XP_017026776.1	Drosophila kikkawai	70.15
PREDICTED: histone-lysine N-methyltransferase pr-set7 [Drosophila bipectinata]	XP_017099846.1	Drosophila bipectinata	73.02
histone-lysine N-methyltransferase PR-Set7 [Drosophila ananassae]	XP_001952898.1	Drosophila ananassae	72.92
PREDICTED: histone-lysine N-methyltransferase pr-set7 [Drosophila rhopaloa]	XP_016992115.1	Drosophila rhopaloa	87.66
histone-lysine N-methyltransferase PR-Set7 [Drosophila elegans]	XP_017117442.1	Drosophila elegans	84.24
PREDICTED: histone-lysine N-methyltransferase pr-set7 [Drosophila biarmipes]	XP_016950104.1	Drosophila biarmipes	83.69
histone-lysine N-methyltransferase PR-Set7 [Drosophila subpulchrella]	XP_037713238.1	Drosophila subpulchrella	84.94
LOW QUALITY PROTEIN: histone-lysine N-methyltransferase PR-Set7 [Drosophila suzukii]	XP_016940022.2	Drosophila suzukii	84.22
PREDICTED: histone-lysine N-methyltransferase pr-set7 [Drosophila ficusphila]	XP_017047011.1	Drosophila ficusphila	82.79
histone-lysine N-methyltransferase PR-Set7 [Drosophila yakuba]	XP_002097877.2	Drosophila yakuba	95.82
histone-lysine N-methyltransferase PR-Set7 [Drosophila santomea]	XP_039492254.1	Drosophila santomea	95.82
histone-lysine N-methyltransferase PR-Set7 [Drosophila erecta]	XP_001979916.2	Drosophila erecta	94.23
PR/SET domain containing protein 7, isoform D [Drosophila melanogaster]	NP_001247100.1	Drosophila melanogaster	100
histone-lysine N-methyltransferase PR-Set7 [Drosophila simulans]	XP_016034725.1	Drosophila simulans	97.68
histone-lysine N-methyltransferase PR-Set7 [Drosophila sechellia]	XP_002031212.2	Drosophila sechellia	97.68
histone-lysine N-methyltransferase PR-Set7 [Drosophila mauritiana]	XP_033167925.1	Drosophila mauritiana	97.54
histone-lysine N-methyltransferase PR-Set7 [Drosophila eugracilis]	XP_017076699.2	Drosophila eugracilis	87.63
PREDICTED: histone-lysine N-methyltransferase pr-set7 [Drosophila takahashii]	XP_017002522.1	Drosophila takahashii	82.23
N-lysine methyltransferase KMT5A-A-like [Vespa mandarinia]	XP_035723688.1	Vespa mandarinia	58.24
PREDICTED: histone-lysine N-methyltransferase pr-set7 [Polistes dominula]	XP_015188928.1	Polistes dominula	59.43
PREDICTED: histone-lysine N-methyltransferase pr-set7 [Polistes canadensis]	XP_014612955.1	Polistes canadensis	58.86
histone-lysine N-methyltransferase PR-Set7 isoform X1 [Odontomachus brunneus]	XP_032684278.1	Odontomachus brunneus	53.49
PREDICTED: histone-lysine N-methyltransferase pr-set7 [Dinoponera quadriceps]	XP_014473499.1	Dinoponera quadriceps	53.49
histone-lysine N-methyltransferase PR-Set7 [Harpegnathos saltator]	XP_025152683.1	Harpegnathos saltator	53.49
histone-lysine N-methyltransferase PR-Set7 [Nasonia vitripennis]	XP_001606615.1	Nasonia vitripennis	63.22
N-lysine methyltransferase KMT5A-like [Copidosoma floridanum]	XP_023247904.1	Copidosoma floridanum	60.23
histone-lysine N-methyltransferase PR-Set7 isoform X1 [Monomorium pharaonis]	XP_012539726.1	Monomorium pharaonis	62.29
histone-lysine N-methyltransferase PR-Set7 [Solenopsis invicta]	XP_011159118.1	Solenopsis invicta	55.41
N-lysine methyltransferase KMT5A-B [Pogonomyrmex barbatus]	XP_011636553.1	Pogonomyrmex barbatus	62.86
PREDICTED: histone-lysine N-methyltransferase pr-set7 isoform X1 [Wasmannia auropunctata]	XP_011684969.1	Wasmannia auropunctata	56.16
PREDICTED: histone-lysine N-methyltransferase pr-set7 [Vollenhovia emeryi]	XP_011865567.1	Vollenhovia emeryi	52.94
histone-lysine N-methyltransferase PR-Set7 [Temnothorax curvispinosus]	XP_024888213.1	Temnothorax curvispinosus	51.08
PREDICTED: histone-lysine N-methyltransferase pr-set7 [Cyphomyrmex costatus]	XP_018402424.1	Cyphomyrmex costatus	61.71
PREDICTED: histone-lysine N-methyltransferase pr-set7 [Trachymyrmex zeteki]	XP_018313662.1	Trachymyrmex zeteki	54.22
PREDICTED: histone-lysine N-methyltransferase pr-set7 [Trachymyrmex cornetzi]	XP_018374828.1	Trachymyrmex cornetzi	53.3
PREDICTED: histone-lysine N-methyltransferase pr-set7 [Trachymyrmex septentrionalis]	XP_018355684.1	Trachymyrmex septentrionalis	54.22
PREDICTED: histone-lysine N-methyltransferase pr-set7 [Acromyrmex echinatior]	XP_011055947.1	Acromyrmex echinatior	53.78
PREDICTED: histone-lysine N-methyltransferase pr-set7 [Atta colombica]	XP_018049573.1	Atta colombica	53.57
PREDICTED: histone-lysine N-methyltransferase pr-set7 [Atta cephalotes]	XP_012055973.1	Atta cephalotes	53.57
histone-lysine N-methyltransferase PR-Set7 [Belonocnema treatae]	XP_033227744.1	Belonocnema treatae	62.71
histone-lysine N-methyltransferase PR-Set7 [Nylanderia fulva]	XP_029167188.1	Nylanderia fulva	50.85
histone-lysine N-methyltransferase PR-Set7 isoform X1 [Camponotus floridanus]	XP_011256975.1	Camponotus floridanus	53.74
histone-lysine N-methyltransferase PR-Set7 [Formica exsecta]	XP_029660712.1	Formica exsecta	52.38
PREDICTED: histone-lysine N-methyltransferase pr-set7 [Neodiprion lecontei]	XP_015510494.1	Neodiprion lecontei	56.61
histone-lysine N-methyltransferase PR-Set7 [Athalia rosae]	XP_012254429.1	Athalia rosae	58.38
histone-lysine N-methyltransferase pr-set7 [Pseudomyrmex gracilis]	XP_020285286.1	Pseudomyrmex gracilis	55.71
PREDICTED: N-lysine methyltransferase SETD8-A [Fopius arisanus]	XP_011297550.1	Fopius arisanus	57.14
N-lysine methyltransferase KMT5A-B [Chelonus insularis]	XP_034947444.1	Chelonus insularis	52.27
PREDICTED: histone-lysine N-methyltransferase pr-set7 [Linepithema humile]	XP_012223752.1	Linepithema humile	53.88
histone-lysine N-methyltransferase pr-set7 [Orussus abietinus]	XP_012288714.1	Orussus abietinus	54.55
PREDICTED: histone-lysine N-methyltransferase pr-set7 [Microplitis demolitor]	XP_008557189.1	Microplitis demolitor	55.33
histone-lysine N-methyltransferase PR-Set7 [Ooceraea biroi]	XP_011341269.1	Ooceraea biroi	54.81
histone-lysine N-methyltransferase PR-Set7 isoform X1 [Cephus cinctus]	XP_015606617.1	Cephus cinctus	59.67
histone-lysine N-methyltransferase PR-Set7 [Osmia lignaria]	XP_034181476.1	Osmia lignaria	59.43
N-lysine methyltransferase KMT5A-A [Megalopta genalis]	XP_033329261.1	Megalopta genalis	58.29
PREDICTED: histone-lysine N-methyltransferase pr-set7 [Dufourea novaeangliae]	XP_015435138.1	Dufourea novaeangliae	53.1
histone-lysine N-methyltransferase set-1 [Nomia melanderi]	XP_031832064.1	Nomia melanderi	60
histone-lysine N-methyltransferase pr-set7 [Bombus terrestris]	XP_003397092.1	Bombus terrestris	60.57
N-lysine methyltransferase KMT5A-A isoform X1 [Bombus vosnesenskii]	XP_033348280.1	Bombus vosnesenskii	60.57
N-lysine methyltransferase KMT5A-A isoform X1 [Bombus impatiens]	XP_003488028.1	Bombus impatiens	61.14
N-lysine methyltransferase KMT5A-A isoform X1 [Bombus bifarius]	XP_033319562.1	Bombus bifarius	61.14
LOW QUALITY PROTEIN: N-lysine methyltransferase KMT5A-A [Apis florea]	XP_012344335.1	Apis florea	60
histone-lysine N-methyltransferase PR-Set7 [Apis cerana]	XP_016911238.1	Apis cerana	52.19
histone-lysine N-methyltransferase PR-Set7 [Apis dorsata]	XP_006617683.1	Apis dorsata	60
histone-lysine N-methyltransferase PR-Set7 [Apis mellifera]	XP_395493.4	Apis mellifera	51.54
N-lysine methyltransferase KMT5A-B [Ceratina calcarata]	XP_017891233.1	Ceratina calcarata	60
PREDICTED: N-lysine methyltransferase KMT5A [Eufriesea mexicana]	XP_017763497.1	Eufriesea mexicana	60
PREDICTED: N-lysine methyltransferase SETD8-like [Megachile rotundata]	XP_003703570.1	Megachile rotundata	62.04
PREDICTED: histone-lysine N-methyltransferase, H3 lysine-4 specific [Habropoda laboriosa]	XP_017798894.1	Habropoda laboriosa	60
N-lysine methyltransferase KMT5A-like [Pomacea canaliculata]	XP_025092343.1	Pomacea canaliculata	52.22
N-lysine methyltransferase KMT5A-A [Exaiptasia diaphana]	XP_020915878.1	Exaiptasia diaphana	52.35
N-lysine methyltransferase KMT5A-like [Gigantopelta aegis]	XP_041348614.1	Gigantopelta aegis	52.87
N-lysine methyltransferase KMT5A-A [Nematostella vectensis]	XP_001629745.2	Nematostella vectensis	52.35
N-lysine methyltransferase KMT5A-A-like isoform X1 [Pecten maximus]	XP_033748180.1	Pecten maximus	50.57
N-lysine methyltransferase KMT5A-B-like [Mizuhopecten yessoensis]	XP_021346317.1	Mizuhopecten yessoensis	50.57
N-lysine methyltransferase KMT5A-A-like [Octopus sinensis]	XP_029642245.1	Octopus sinensis	57.47
N-lysine methyltransferase KMT5A-A [Lingula anatina]	XP_013410514.1	Lingula anatina	56.73
PREDICTED: N-lysine methyltransferase SETD8-B-like isoform X1 [Priapulus caudatus]	XP_014673199.1	Priapulus caudatus	58.38
PREDICTED: N-lysine methyltransferase KMT5A-B-like [Branchiostoma belcheri]	XP_019643610.1	Branchiostoma belcheri	56.47
N-lysine methyltransferase KMT5A-B-like [Homarus americanus]	XP_042225602.1	Homarus americanus	59.2
N-lysine methyltransferase KMT5A-B-like [Penaeus vannamei]	XP_027214201.1	Penaeus vannamei	53.52
N-lysine methyltransferase KMT5A-A-like isoform X1 [Penaeus monodon]	XP_037788339.1	Penaeus monodon	52.25
N-lysine methyltransferase KMT5A-A-like [Lytechinus variegatus]	XP_041457189.1	Lytechinus variegatus	55.75
N-lysine methyltransferase KMT5A [Strongylocentrotus purpuratus]	XP_797080.2	Strongylocentrotus purpuratus	54.02
N-lysine methyltransferase KMT5A [Crassostrea gigas]	XP_034338518.1	Crassostrea gigas	55.11
N-lysine methyltransferase KMT5A-like isoform X1 [Crassostrea virginica]	XP_022338924.1	Crassostrea virginica	54.02
N-lysine methyltransferase KMT5A-like [Stegodyphus dumicola]	XP_035222673.1	Stegodyphus dumicola	53.41
N-lysine methyltransferase KMT5A [Parasteatoda tepidariorum]	XP_015914152.1	Parasteatoda tepidariorum	51.96
N-lysine methyltransferase KMT5A-like [Anneissia japonica]	XP_033106938.1	Anneissia japonica	51.74
LOW QUALITY PROTEIN: N-lysine methyltransferase KMT5A-like [Dermacentor silvarum]	XP_037566073.1	Dermacentor silvarum	55.23
N-lysine methyltransferase KMT5A-like [Rhipicephalus sanguineus]	XP_037513738.1	Rhipicephalus sanguineus	54.65
N-lysine methyltransferase KMT5A-A [Ixodes scapularis]	XP_029833939.2	Ixodes scapularis	54.65
N-lysine methyltransferase KMT5A-like [Limulus polyphemus]	XP_013788393.1	Limulus polyphemus	52.91
histone-lysine N-methyltransferase PR-Set7 [Folsomia candida]	XP_021957082.1	Folsomia candida	57.8
histone-lysine N-methyltransferase PR-Set7-like [Thrips palmi]	XP_034237049.1	Thrips palmi	61.41
histone-lysine N-methyltransferase PR-Set7 [Frankliniella occidentalis]	XP_026279448.1	Frankliniella occidentalis	53.75
N-lysine methyltransferase KMT5A-A [Cimex lectularius]	XP_014244326.1	Cimex lectularius	58.6
N-lysine methyltransferase KMT5A [Halyomorpha halys]	XP_014276805.1	Halyomorpha halys	58.55
histone-lysine N-methyltransferase PR-Set7-like [Nilaparvata lugens]	XP_039291196.1	Nilaparvata lugens	59.07
N-lysine methyltransferase KMT5A isoform X2 [Zootermopsis nevadensis]	XP_021921759.1	Zootermopsis nevadensis	63.89
histone-lysine N-methyltransferase PR-Set7 isoform X2 [Cryptotermes secundus]	XP_023704310.1	Cryptotermes secundus	62.98
N-lysine methyltransferase KMT5A-B-like isoform X1 [Lepeophtheirus salmonis]	XP_040578819.1	Lepeophtheirus salmonis	52.22
histone-lysine N-methyltransferase pr-set7-like [Trichogramma pretiosum]	XP_014235598.1	Trichogramma pretiosum	55.17
N-lysine methyltransferase KMT5A-like isoform X1 [Pollicipes pollicipes]	XP_037078305.1	Pollicipes pollicipes	56
histone-lysine N-methyltransferase PR-Set7 isoform X1 [Sipha flava]	XP_025410831.1	Sipha flava	50.24
N-lysine methyltransferase KMT5A-A isoform X1 [Melanaphis sacchari]	XP_025206091.1	Melanaphis sacchari	55
N-lysine methyltransferase KMT5A-A isoform X2 [Aphis gossypii]	XP_027836335.1	Aphis gossypii	55.93
N-lysine methyltransferase KMT5A-A isoform X1 [Rhopalosiphum maidis]	XP_026804514.1	Rhopalosiphum maidis	55
PREDICTED: N-lysine methyltransferase SETD8-B [Diuraphis noxia]	XP_015375531.1	Diuraphis noxia	56.9
N-lysine methyltransferase KMT5A-A [Myzus persicae]	XP_022178814.1	Myzus persicae	56.11
N-lysine methyltransferase KMT5A-B isoform X1 [Acyrthosiphon pisum]	XP_008180226.2	Acyrthosiphon pisum	54.44
N-lysine methyltransferase KMT5A-A-like [Daphnia magna]	XP_032794714.1	Daphnia magna	65.14
histone-lysine N-methyltransferase PR-Set7 [Lucilia sericata]	XP_037806817.1	Lucilia sericata	54.11
LOW QUALITY PROTEIN: N-lysine methyltransferase KMT5A-A [Anopheles merus]	XP_041764474.1	Anopheles merus	62.29
N-lysine methyltransferase KMT5A [Anopheles coluzzii]	XP_040240796.1	Anopheles coluzzii	62.29
PREDICTED: histone-lysine N-methyltransferase pr-set7 [Papilio polytes]	XP_013144994.1	Papilio polytes	58.65
PREDICTED: histone-lysine N-methyltransferase pr-set7 [Papilio xuthus]	XP_013167902.1	Papilio xuthus	63.84
PREDICTED: histone-lysine N-methyltransferase pr-set7 [Papilio machaon]	XP_014356304.1	Papilio machaon	63.28
histone-lysine N-methyltransferase PR-Set7 [Zerene cesonia]	XP_038212873.1	Zerene cesonia	66.11
histone-lysine N-methyltransferase pr-set7 [Pieris rapae]	XP_022131050.1	Pieris rapae	64
histone-lysine N-methyltransferase PR-Set7 [Vanessa tameamea]	XP_026501344.1	Vanessa tameamea	64.41
histone-lysine N-methyltransferase PR-Set7 [Maniola hyperantus]	XP_034827983.1	Maniola hyperantus	63.74
histone-lysine N-methyltransferase pr-set7 isoform X1 [Bicyclus anynana]	XP_023943871.1	Bicyclus anynana	59.61
histone-lysine N-methyltransferase PR-Set7 isoform X1 [Pararge aegeria]	XP_039752433.1	Pararge aegeria	59.51
histone-lysine N-methyltransferase PR-Set7-like [Plutella xylostella]	XP_037974410.1	Plutella xylostella	61.71
histone-lysine N-methyltransferase PR-Set7 [Aricia agestis]	XP_041972161.1	Aricia agestis	57
histone-lysine N-methyltransferase PR-Set7 [Bombyx mori]	XP_004928896.1	Bombyx mori	59.31
histone-lysine N-methyltransferase PR-Set7 [Hyposmocoma kahamanoa]	XP_026314196.1	Hyposmocoma kahamanoa	62.98
histone-lysine N-methyltransferase PR-Set7 isoform X1 [Manduca sexta]	XP_030021963.1	Manduca sexta	65.19
histone-lysine N-methyltransferase PR-Set7 [Ostrinia furnacalis]	XP_028176026.1	Ostrinia furnacalis	65.71
histone-lysine N-methyltransferase PR-Set7 [Galleria mellonella]	XP_026754950.1	Galleria mellonella	66.3
PREDICTED: histone-lysine N-methyltransferase pr-set7 [Amyelois transitella]	XP_013189633.1	Amyelois transitella	65.75
histone-lysine N-methyltransferase PR-Set7 [Trichoplusia ni]	XP_026740521.1	Trichoplusia ni	66.1
histone-lysine N-methyltransferase pr-set7 isoform X2 [Helicoverpa armigera]	XP_021182463.1	Helicoverpa armigera	66.86
histone-lysine N-methyltransferase pr-set7 [Spodoptera litura]	XP_022832180.1	Spodoptera litura	66.1
histone-lysine N-methyltransferase PR-Set7-like [Spodoptera frugiperda]	XP_035449006.1	Spodoptera frugiperda	66.1
N-lysine methyltransferase KMT5A-B [Culex quinquefasciatus]	XP_001842297.2	Culex quinquefasciatus	56.11
histone-lysine N-methyltransferase PR-Set7 [Drosophila busckii]	XP_017848159.1	Drosophila busckii	65.11
N-lysine methyltransferase KMT5A-A [Ctenocephalides felis]	XP_026473408.1	Ctenocephalides felis	66.67
histone-lysine N-methyltransferase pr-set7 isoform X1 [Ceratitis capitata]	XP_004530008.1	Ceratitis capitata	52.62
histone-lysine N-methyltransferase PR-Set7 [Zeugodacus cucurbitae]	XP_011181958.1	Zeugodacus cucurbitae	51.62
histone-lysine N-methyltransferase PR-Set7 isoform X1 [Bactrocera oleae]	XP_014090656.1	Bactrocera oleae	50.86
histone-lysine N-methyltransferase PR-Set7 [Bactrocera dorsalis]	XP_019847184.1	Bactrocera dorsalis	51.72
PREDICTED: histone-lysine N-methyltransferase pr-set7 isoform X1 [Bactrocera latifrons]	XP_018786759.1	Bactrocera latifrons	51.33
PREDICTED: N-lysine methyltransferase KMT5A isoform X1 [Bemisia tabaci]	XP_018900037.1	Bemisia tabaci	61.85
N-lysine methyltransferase KMT5A [Agrilus planipennis]	XP_025837662.1	Agrilus planipennis	61.71
N-lysine methyltransferase KMT5A [Photinus pyralis]	XP_031331472.1	Photinus pyralis	60
PREDICTED: histone-lysine N-methyltransferase pr-set7 isoform X1 [Nicrophorus vespilloides]	XP_017769248.1	Nicrophorus vespilloides	51.69
histone-lysine N-methyltransferase pr-set7-like [Onthophagus taurus]	XP_022912467.1	Onthophagus taurus	63.07
PREDICTED: N-lysine methyltransferase KMT5A-B [Aethina tumida]	XP_019874984.1	Aethina tumida	66.86
PREDICTED: histone-lysine N-methyltransferase pr-set7 [Tribolium castaneum]	XP_969412.2	Tribolium castaneum	51.54
N-lysine methyltransferase KMT5A-A-like [Leptinotarsa decemlineata]	XP_023020512.1	Leptinotarsa decemlineata	59.22
histone-lysine N-methyltransferase pr-set7-like [Anoplophora glabripennis]	XP_018569294.1	Anoplophora glabripennis	62.57
PREDICTED: histone-lysine N-methyltransferase pr-set7 [Dendroctonus ponderosae]	XP_019769193.1	Dendroctonus ponderosae	61.33
histone-lysine N-methyltransferase PR-Set7-like [Sitophilus oryzae]	XP_030754877.1	Sitophilus oryzae	58.45
hypothetical protein LOTGIDRAFT_117025 [Lottia gigantea]	XP_009054021.1	Lottia gigantea	54.24
lysine methyltransferase 5Ab [Pimephales promelas]	XP_039518088.1	Pimephales promelas	53.76
lysine methyltransferase 5Ab [Cyprinus carpio]	XP_018945765.2	Cyprinus carpio	53.76
N-lysine methyltransferase KMT5A-A-like [Carassius auratus]	XP_026110847.1	Carassius auratus	53.76
PREDICTED: N-lysine methyltransferase SETD8-A-like isoform X1 [Sinocyclocheilus grahami]	XP_016094508.1	Sinocyclocheilus grahami	54.34
PREDICTED: N-lysine methyltransferase KMT5A-A-like isoform X1 [Sinocyclocheilus rhinocerous]	XP_016393658.1	Sinocyclocheilus rhinocerous	54.91
PREDICTED: N-lysine methyltransferase KMT5A-like [Sinocyclocheilus anshuiensis]	XP_016360858.1	Sinocyclocheilus anshuiensis	54.34
N-lysine methyltransferase KMT5A [Rhinatrema bivittatum]	XP_029426863.1	Rhinatrema bivittatum	50.79
N-lysine methyltransferase KMT5A [Microcaecilia unicolor]	XP_030075425.1	Microcaecilia unicolor	50.75
N-lysine methyltransferase KMT5A isoform X3 [Geotrypetes seraphini]	XP_033812295.1	Geotrypetes seraphini	50.51
N-lysine methyltransferase KMT5A isoform X1 [Sarcophilus harrisii]	XP_031804317.1	Sarcophilus harrisii	50.51
N-lysine methyltransferase KMT5A isoform X1 [Vombatus ursinus]	XP_027709362.1	Vombatus ursinus	50.51
N-lysine methyltransferase KMT5A isoform X2 [Ochotona princeps]	XP_004595399.1	Ochotona princeps	52.27
N-lysine methyltransferase KMT5A isoform X5 [Ochotona curzoniae]	XP_040843036.1	Ochotona curzoniae	52.27
N-lysine methyltransferase KMT5A [Echinops telfairi]	XP_030743323.1	Echinops telfairi	51.3
N-lysine methyltransferase KMT5A isoform X1 [Sturnira hondurensis]	XP_036907823.1	Sturnira hondurensis	52.84
N-lysine methyltransferase KMT5A isoform X2 [Artibeus jamaicensis]	XP_037016867.1	Artibeus jamaicensis	52.84
N-lysine methyltransferase KMT5A isoform 1 [Mus musculus]	NP_084517.2	Mus musculus	46.3
N-lysine methyltransferase KMT5A [Cavia porcellus]	XP_023417769.1	Cavia porcellus	52.27
N-lysine methyltransferase KMT5A [Fukomys damarensis]	XP_019060090.1	Fukomys damarensis	50.52
PREDICTED: N-lysine methyltransferase SETD8 isoform X1 [Galeopterus variegatus]	XP_008589620.1	Galeopterus variegatus	50.25
N-lysine methyltransferase KMT5A isoform 1 [Homo sapiens]	NP_065115.3	Homo sapiens	45.83
N-lysine methyltransferase KMT5A isoform X1 [Pipistrellus kuhlii]	XP_036305123.1	Pipistrellus kuhlii	51.3
N-lysine methyltransferase KMT5A isoform X1 [Suricata suricatta]	XP_029778109.1	Suricata suricatta	50.25
N-lysine methyltransferase KMT5A isoform X1 [Sus scrofa]	XP_020927921.1	Sus scrofa	52.27
N-lysine methyltransferase KMT5A isoform X1 [Oryx dammah]	XP_040106642.1	Oryx dammah	52.27
PREDICTED: N-lysine methyltransferase KMT5A [Hipposideros armiger]	XP_019504571.1	Hipposideros armiger	51.3
N-lysine methyltransferase KMT5A isoform X1 [Rhinolophus ferrumequinum]	XP_032953903.1	Rhinolophus ferrumequinum	50.25
lysine methyltransferase 5Ab [Alosa sapidissima]	XP_041956902.1	Alosa sapidissima	53.18
lysine methyltransferase 5Ab [Clupea harengus]	XP_012688523.2	Clupea harengus	52.57
N-lysine methyltransferase KMT5A-like [Polyodon spathula]	XP_041078490.1	Polyodon spathula	54.34
N-lysine methyltransferase KMT5A-B-like [Acipenser ruthenus]	XP_034757684.1	Acipenser ruthenus	53.76
N-lysine methyltransferase KMT5A-A isoform X1 [Salvelinus alpinus]	XP_023839314.1	Salvelinus alpinus	50.29
PREDICTED: N-lysine methyltransferase SETD8-A-like isoform X1 [Salmo salar]	XP_013982898.1	Salmo salar	50.29
N-lysine methyltransferase KMT5A-A-like isoform X1 [Salmo trutta]	XP_029564647.1	Salmo trutta	50.29
lysine methyltransferase 5Ab isoform X1 [Oncorhynchus mykiss]	XP_021461739.2	Oncorhynchus mykiss	52.57
lysine methyltransferase 5Ab isoform X1 [Salvelinus namaycush]	XP_038823145.1	Salvelinus namaycush	51.43
N-lysine methyltransferase KMT5A-like isoform X1 [Oncorhynchus nerka]	XP_029493754.1	Oncorhynchus nerka	52
lysine methyltransferase 5Ab isoform X1 [Oncorhynchus tshawytscha]	XP_024257017.1	Oncorhynchus tshawytscha	52
N-lysine methyltransferase KMT5A-like [Oncorhynchus keta]	XP_035641619.1	Oncorhynchus keta	52
N-lysine methyltransferase KMT5A [Oncorhynchus kisutch]	XP_020327890.1	Oncorhynchus kisutch	52
N-lysine methyltransferase KMT5A-A-like isoform X1 [Astyanax mexicanus]	XP_022542493.1	Astyanax mexicanus	50.28
N-lysine methyltransferase KMT5A-like [Trichosurus vulpecula]	XP_036596313.1	Trichosurus vulpecula	52.6
lysine methyltransferase 5Ab isoform X1 [Esox lucius]	XP_012992181.2	Esox lucius	53.14
N-lysine methyltransferase KMT5A isoform X1 [Denticeps clupeoides]	XP_028829162.1	Denticeps clupeoides	53.18
N-lysine methyltransferase KMT5A-A-like isoform X1 [Coregonus clupeaformis]	XP_041692263.1	Coregonus clupeaformis	53.14
N-lysine methyltransferase KMT5A-A-like [Chanos chanos]	XP_030650286.1	Chanos chanos	53.76
N-lysine methyltransferase KMT5A [Salarias fasciatus]	XP_029940323.1	Salarias fasciatus	51.12
lysine methyltransferase 5Ab [Megalops cyprinoides]	XP_036383594.1	Megalops cyprinoides	52.57
N-lysine methyltransferase KMT5A isoform X1 [Paramormyrops kingsleyae]	XP_023699101.1	Paramormyrops kingsleyae	53.18
N-lysine methyltransferase KMT5A-A [Acanthopagrus latus]	XP_036972840.1	Acanthopagrus latus	52
N-lysine methyltransferase KMT5A isoform X1 [Sparus aurata]	XP_030290898.1	Sparus aurata	50.86
N-lysine methyltransferase KMT5A [Archocentrus centrarchus]	XP_030598010.1	Archocentrus centrarchus	50.86
N-lysine methyltransferase KMT5A isoform X1 [Callorhinchus milii]	XP_007905989.1	Callorhinchus milii	54.34
N-lysine methyltransferase KMT5A-A isoform X1 [Anguilla anguilla]	XP_035247861.1	Anguilla anguilla	52.6
N-lysine methyltransferase KMT5A-B [Xenopus laevis]	NP_001082246.1	Xenopus laevis	54.34
PREDICTED: N-lysine methyltransferase KMT5A [Nanorana parkeri]	XP_018412327.1	Nanorana parkeri	53.76
PREDICTED: N-lysine methyltransferase SETD8 [Lepisosteus oculatus]	XP_015221637.1	Lepisosteus oculatus	52.02
N-lysine methyltransferase KMT5A isoform X2 [Rana temporaria]	XP_040203223.1	Rana temporaria	51.43
N-lysine methyltransferase KMT5A [Pogona vitticeps]	XP_020658381.1	Pogona vitticeps	50.25
N-lysine methyltransferase KMT5A isoform X1 [Pseudonaja textilis]	XP_026575185.1	Pseudonaja textilis	53.18
N-lysine methyltransferase KMT5A isoform X1 [Notechis scutatus]	XP_026542793.1	Notechis scutatus	50.25
PREDICTED: N-lysine methyltransferase KMT5A [Anolis carolinensis]	XP_008111896.1	Anolis carolinensis	52.84
N-lysine methyltransferase KMT5A [Pantherophis guttatus]	XP_034284514.1	Pantherophis guttatus	53.18
N-lysine methyltransferase KMT5A [Crotalus tigris]	XP_039218526.1	Crotalus tigris	53.18
N-lysine methyltransferase KMT5A isoform X1 [Python bivittatus]	XP_007424711.1	Python bivittatus	53.18
N-lysine methyltransferase KMT5A isoform X1 [Melopsittacus undulatus]	XP_033924404.1	Melopsittacus undulatus	53.18
N-lysine methyltransferase KMT5A [Nothoprocta perdicaria]	XP_025893269.1	Nothoprocta perdicaria	53.18
PREDICTED: N-lysine methyltransferase SETD8 [Pterocles gutturalis]	XP_010080167.1	Pterocles gutturalis	50.8
N-lysine methyltransferase KMT5A [Zonotrichia albicollis]	XP_014125694.1	Zonotrichia albicollis	50.25
lysine methyltransferase 5Ab isoform X1 [Syngnathus acus]	XP_037114574.1	Syngnathus acus	51.79
lysine methyltransferase 5Ab [Periophthalmus magnuspinnatus]	XP_033828023.1	Periophthalmus magnuspinnatus	50.86
N-lysine methyltransferase KMT5A-like [Takifugu rubripes]	XP_011613983.2	Takifugu rubripes	56.57
PREDICTED: N-lysine methyltransferase SETD8-A-like isoform X1 [Cyprinodon variegatus]	XP_015234295.1	Cyprinodon variegatus	53.18
lysine methyltransferase 5Ab [Cyprinodon tularosa]	XP_038151485.1	Cyprinodon tularosa	53.18
lysine methyltransferase 5Ab [Fundulus heteroclitus]	XP_012718855.2	Fundulus heteroclitus	53.49
N-lysine methyltransferase KMT5A-like [Xiphophorus hellerii]	XP_032434573.1	Xiphophorus hellerii	51.43
N-lysine methyltransferase KMT5A-like [Xiphophorus maculatus]	XP_005795024.2	Xiphophorus maculatus	51.43
N-lysine methyltransferase KMT5A-like isoform X1 [Xiphophorus couchianus]	XP_027889504.1	Xiphophorus couchianus	51.43
PREDICTED: N-lysine methyltransferase KMT5A-like [Poecilia reticulata]	XP_008416801.1	Poecilia reticulata	52.57
PREDICTED: N-lysine methyltransferase SETD8-like isoform X1 [Poecilia mexicana]	XP_014831781.1	Poecilia mexicana	52.57
PREDICTED: N-lysine methyltransferase KMT5A-like isoform X1 [Poecilia formosa]	XP_007572186.1	Poecilia formosa	52.57
PREDICTED: N-lysine methyltransferase SETD8-like isoform X1 [Poecilia latipinna]	XP_014881266.1	Poecilia latipinna	52
N-lysine methyltransferase KMT5A isoform X1 [Oryzias latipes]	XP_011477425.1	Oryzias latipes	54.29
lysine methyltransferase 5Ab [Oryzias melastigma]	XP_024131876.1	Oryzias melastigma	53.71
lysine methyltransferase 5Ab [Thalassophryne amazonica]	XP_034026250.1	Thalassophryne amazonica	53.71
N-lysine methyltransferase KMT5A-like isoform X1 [Myripristis murdjan]	XP_029916736.1	Myripristis murdjan	53.71
PREDICTED: N-lysine methyltransferase SETD8 [Nothobranchius furzeri]	XP_015828560.1	Nothobranchius furzeri	52
lysine methyltransferase 5Ab [Kryptolebias marmoratus]	XP_017269189.1	Kryptolebias marmoratus	53.76
lysine methyltransferase 5Ab [Nematolebias whitei]	XP_037536010.1	Nematolebias whitei	51.43
N-lysine methyltransferase KMT5A-like [Labrus bergylta]	XP_020506370.1	Labrus bergylta	54.86
lysine methyltransferase 5Ab [Cheilinus undulatus]	XP_041643876.1	Cheilinus undulatus	52
lysine methyltransferase 5Ab [Gymnodraco acuticeps]	XP_034094133.1	Gymnodraco acuticeps	51.43
lysine methyltransferase 5Ab [Notolabrus celidotus]	XP_034547286.1	Notolabrus celidotus	53.71
N-lysine methyltransferase KMT5A-like isoform X1 [Anarrhichthys ocellatus]	XP_031712622.1	Anarrhichthys ocellatus	52
lysine methyltransferase 5Ab isoform X1 [Morone saxatilis]	XP_035513514.1	Morone saxatilis	53.71
lysine methyltransferase 5Ab [Sebastes umbrosus]	XP_037633682.1	Sebastes umbrosus	53.71
lysine methyltransferase 5Ab [Epinephelus lanceolatus]	XP_033476265.1	Epinephelus lanceolatus	52.57
N-lysine methyltransferase KMT5A-like [Cottoperca gobio]	XP_029295704.1	Cottoperca gobio	51.43
lysine methyltransferase 5Ab isoform X1 [Plectropomus leopardus]	XP_042344656.1	Plectropomus leopardus	51.43
LOW QUALITY PROTEIN: N-lysine methyltransferase KMT5A-like [Etheostoma spectabile]	XP_032373011.1	Etheostoma spectabile	52.81
lysine methyltransferase 5Ab isoform X1 [Perca fluviatilis]	XP_039659842.1	Perca fluviatilis	53.37
N-lysine methyltransferase KMT5A-like [Perca flavescens]	XP_028434626.1	Perca flavescens	52.81
lysine methyltransferase 5Ab isoform X1 [Sander lucioperca]	XP_031165020.1	Sander lucioperca	53.37
lysine methyltransferase 5Ab isoform X1 [Betta splendens]	XP_040928245.1	Betta splendens	50.86
N-lysine methyltransferase KMT5A-like isoform X1 [Cynoglossus semilaevis]	XP_024909076.1	Cynoglossus semilaevis	50.77
N-lysine methyltransferase KMT5A [Oreochromis niloticus]	XP_003451672.1	Oreochromis niloticus	54.34
lysine methyltransferase 5Ab [Oreochromis aureus]	XP_031611214.1	Oreochromis aureus	54.34
N-lysine methyltransferase KMT5A [Maylandia zebra]	XP_024660296.1	Maylandia zebra	53.18
PREDICTED: N-lysine methyltransferase SETD8-like [Pundamilia nyererei]	XP_005722170.1	Pundamilia nyererei	52.6
lysine methyltransferase 5Ab [Haplochromis burtoni]	XP_042074315.1	Haplochromis burtoni	53.18
lysine methyltransferase 5Ab [Simochromis diagramma]	XP_039875694.1	Simochromis diagramma	52.02
lysine methyltransferase 5Ab [Melanotaenia boesemani]	XP_041854425.1	Melanotaenia boesemani	53.14
N-lysine methyltransferase KMT5A-like isoform X1 [Parambassis ranga]	XP_028270371.1	Parambassis ranga	51.12
N-lysine methyltransferase KMT5A-A-like [Mastacembelus armatus]	XP_026178096.1	Mastacembelus armatus	52
PREDICTED: N-lysine methyltransferase SETD8-like [Stegastes partitus]	XP_008288055.1	Stegastes partitus	53.76
lysine methyltransferase 5Ab isoform X1 [Amphiprion ocellaris]	XP_023138175.1	Amphiprion ocellaris	53.14
N-lysine methyltransferase KMT5A [Acanthochromis polyacanthus]	XP_022052044.1	Acanthochromis polyacanthus	52.57
N-lysine methyltransferase KMT5A-A-like isoform X1 [Echeneis naucrates]	XP_029367221.1	Echeneis naucrates	54.29
lysine methyltransferase 5Ab [Anabas testudineus]	XP_026199767.1	Anabas testudineus	54.29
N-lysine methyltransferase KMT5A isoform X1 [Monopterus albus]	XP_020458189.1	Monopterus albus	51.43
lysine methyltransferase 5Ab [Hippoglossus stenolepis]	XP_035021895.1	Hippoglossus stenolepis	55.49
PREDICTED: N-lysine methyltransferase KMT5A-like [Paralichthys olivaceus]	XP_019956634.1	Paralichthys olivaceus	55.49
lysine methyltransferase 5Ab [Toxotes jaculatrix]	XP_040899142.1	Toxotes jaculatrix	52.57
lysine methyltransferase 5Ab [Chelmon rostratus]	XP_041792989.1	Chelmon rostratus	53.71
N-lysine methyltransferase KMT5A isoform X1 [Larimichthys crocea]	XP_010730826.2	Larimichthys crocea	53.71
N-lysine methyltransferase KMT5A-A-like [Scophthalmus maximus]	XP_035496019.1	Scophthalmus maximus	53.76
lysine methyltransferase 5Ab [Micropterus salmoides]	XP_038558912.1	Micropterus salmoides	50.25
PREDICTED: N-lysine methyltransferase KMT5A-like [Lates calcarifer]	XP_018524039.1	Lates calcarifer	53.14
lysine methyltransferase 5Ab [Xiphias gladius]	XP_040011803.1	Xiphias gladius	53.71
N-lysine methyltransferase KMT5A-A-like [Seriola dumerili]	XP_022613557.1	Seriola dumerili	52.57
